# Supplementary material for: The Potential Protective Effect and Underlying Mechanisms of Physiological Unconjugated Hyperbilirubinemia Mediated by UGT1A1 Antisense Oligonucleotide Therapy in a Mouse Model of Cyclosporine A-Induced Chronic Kidney Disease
Source: MDPI journal article supplement (doi:10.3390/metabo12100999), 2022-10-20
Supplement: s1 [file s1]

# The Potential Protective Effect and Underlying Mechanisms of Physiological Unconjugated Hyperbilirubinemia Mediated by UGT1A1 Antisense Oligonucleotide Therapy in a Mouse Model of Cyclosporine A-Induced Chronic Kidney Disease

Basma H. Marghani <sup>1,2,\*</sup>, Mohamed El-Adl <sup>3</sup>, Ahmed I. Ateya <sup>4</sup>, Basma H. Othman <sup>5</sup>, Heba I. Ghamry <sup>6</sup>, Mustafa Shukry <sup>7,\*</sup>, Mohamed Mohamed Soliman <sup>8</sup> and Mohamed Abdo Rizk <sup>9</sup>

<sup>1</sup> Department of Physiology, Faculty of Veterinary Medicine, Mansoura University, Mansoura 35516, Egypt

<sup>2</sup> Department of Biochemistry, Physiology, and Pharmacology, Faculty of Veterinary Medicine, King Salman International University, South of Sinaa 46612, Egypt

<sup>3</sup> Department of Biochemistry, Faculty of Veterinary Medicine, Mansoura University, Mansoura 35516, Egypt

<sup>4</sup> Department of Husbandry & Development of Animal Wealth, Faculty of Veterinary Medicine, Mansoura University, Mansoura 35516, Egypt

<sup>5</sup> Medical Research Center, Faculty of Medicine, Mansoura University, Mansoura 35516, Egypt

<sup>6</sup> Department of Home Economics, College of Home Economics, King Khalid University, P.O. Box 960, Abha 61421, Saudi Arabia

<sup>7</sup> Department of Physiology, Faculty of Veterinary Medicine, Kafrelsheikh University, Kafrelsheikh 33516, Egypt

<sup>8</sup> Department of Biochemistry, Faculty of Veterinary Medicine, Benha University, Benha 13518, Egypt

<sup>9</sup> Department of Internal Medicine and Infectious Diseases, Faculty of Veterinary Medicine, Mansoura University, Mansoura 35516, Egypt

\* Correspondence: basmahamed@mans.edu.eg (B.H.M.); mostafa.ataa@vet.kfs.edu.eg (M.S.)

Supplementary data

Supplementary Figure S1: Masson trichrome-stained kidney sections

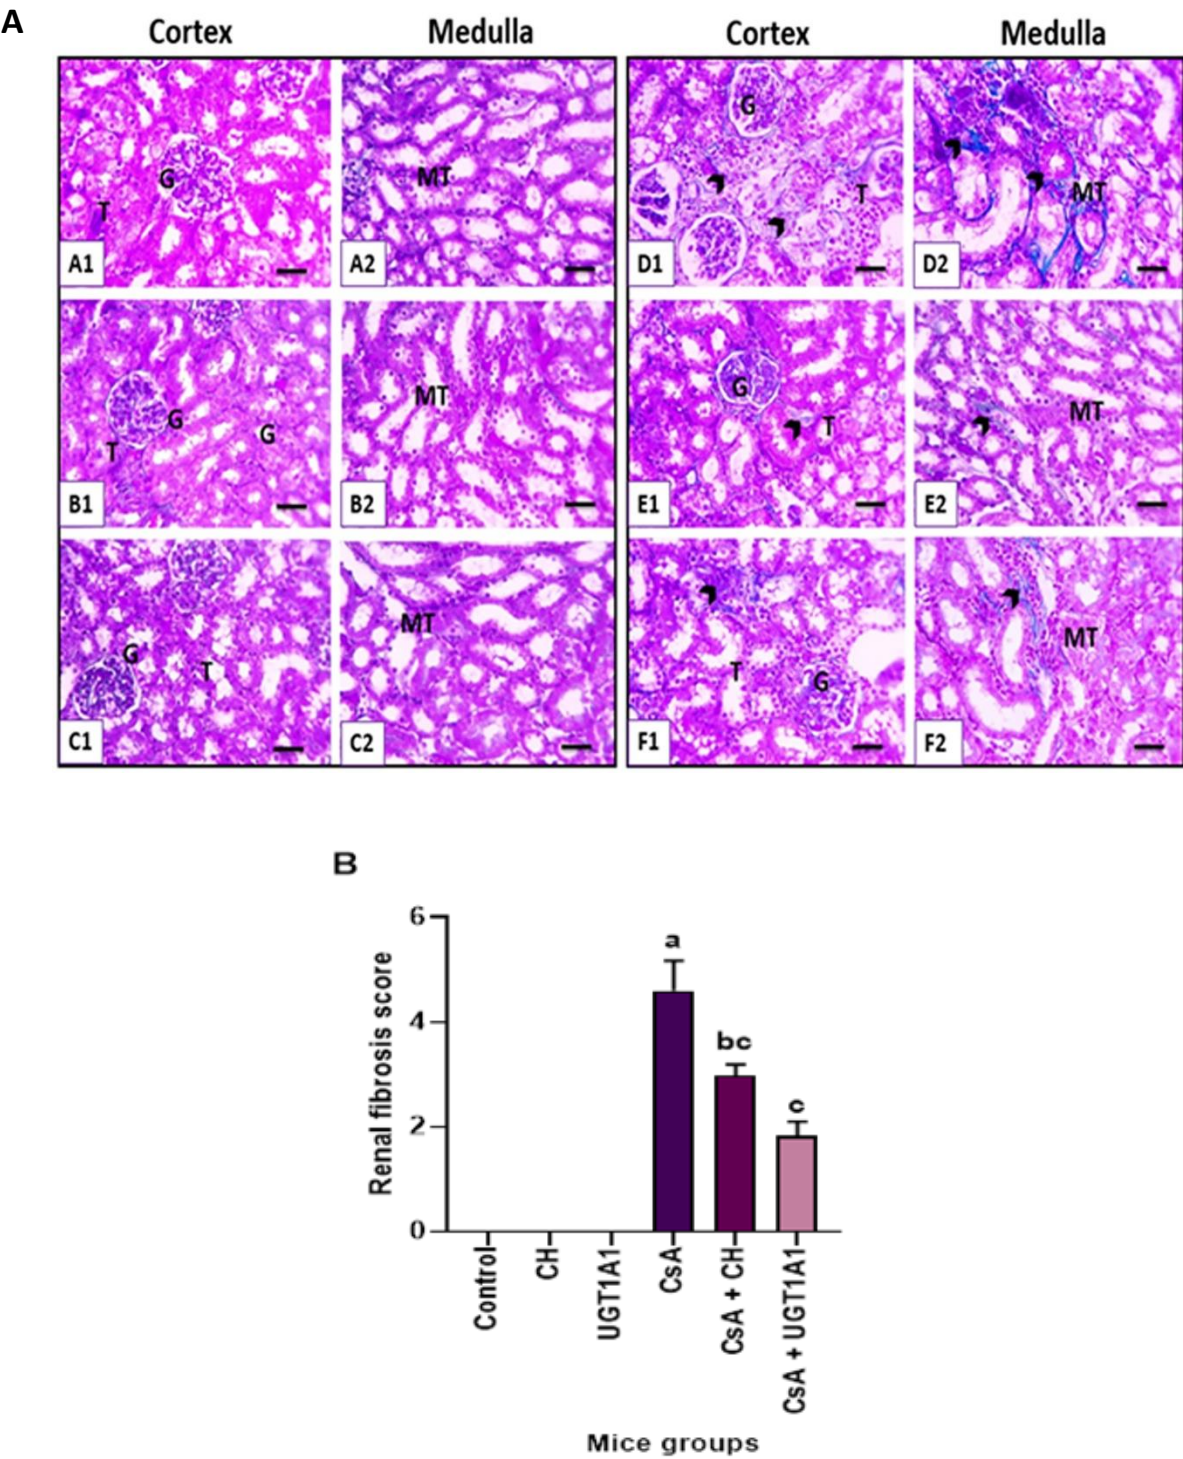

Figure S1: A) Photomicrograph of kidney sections in different experimental groups (Masson trichrome; X: 400). No collagen deposition in interstitial tissue neither in cortex

nor in medulla in kidney sections of the control group (A1, A2), CH-treated group (B1, B2), and UGT1A1 antisense oligonucleotide-treated group (C1, C2). Excessive bluish stained collagen deposition in interstitial tissue (arrowheads) in cortex and medulla in kidney sections of CsA-treated group (D1, D2). Markedly decreased bluish stained collagen deposition in interstitial tissue (arrowheads) in cortex and medulla in kidney sections of CsA + CH-treated group (E1, E2). Moderately decreased bluish stained collagen deposition in interstitial tissue (arrowheads) in cortex and medulla in kidney sections of CsA + UGT1A1 antisense oligonucleotide-treated group (F1, F2). Glomeruli (G) and tubules (T), medullary tubules (MT). B) Semi-quantitative analysis of renal tissue lesions based on the highest % of fields affected with renal interstitial fibrosis (Trichrome positive area %) expressed as a score (0-5) in different experimental groups. Values are expressed as mean  $\pm$  SEM (n = 8). Means of different letters are different statistically ( $P < 0.05$ ). (ANOVA; Duncan's post hoc analysis).

Supplementary Figure S2: PAS-stained kidney sections

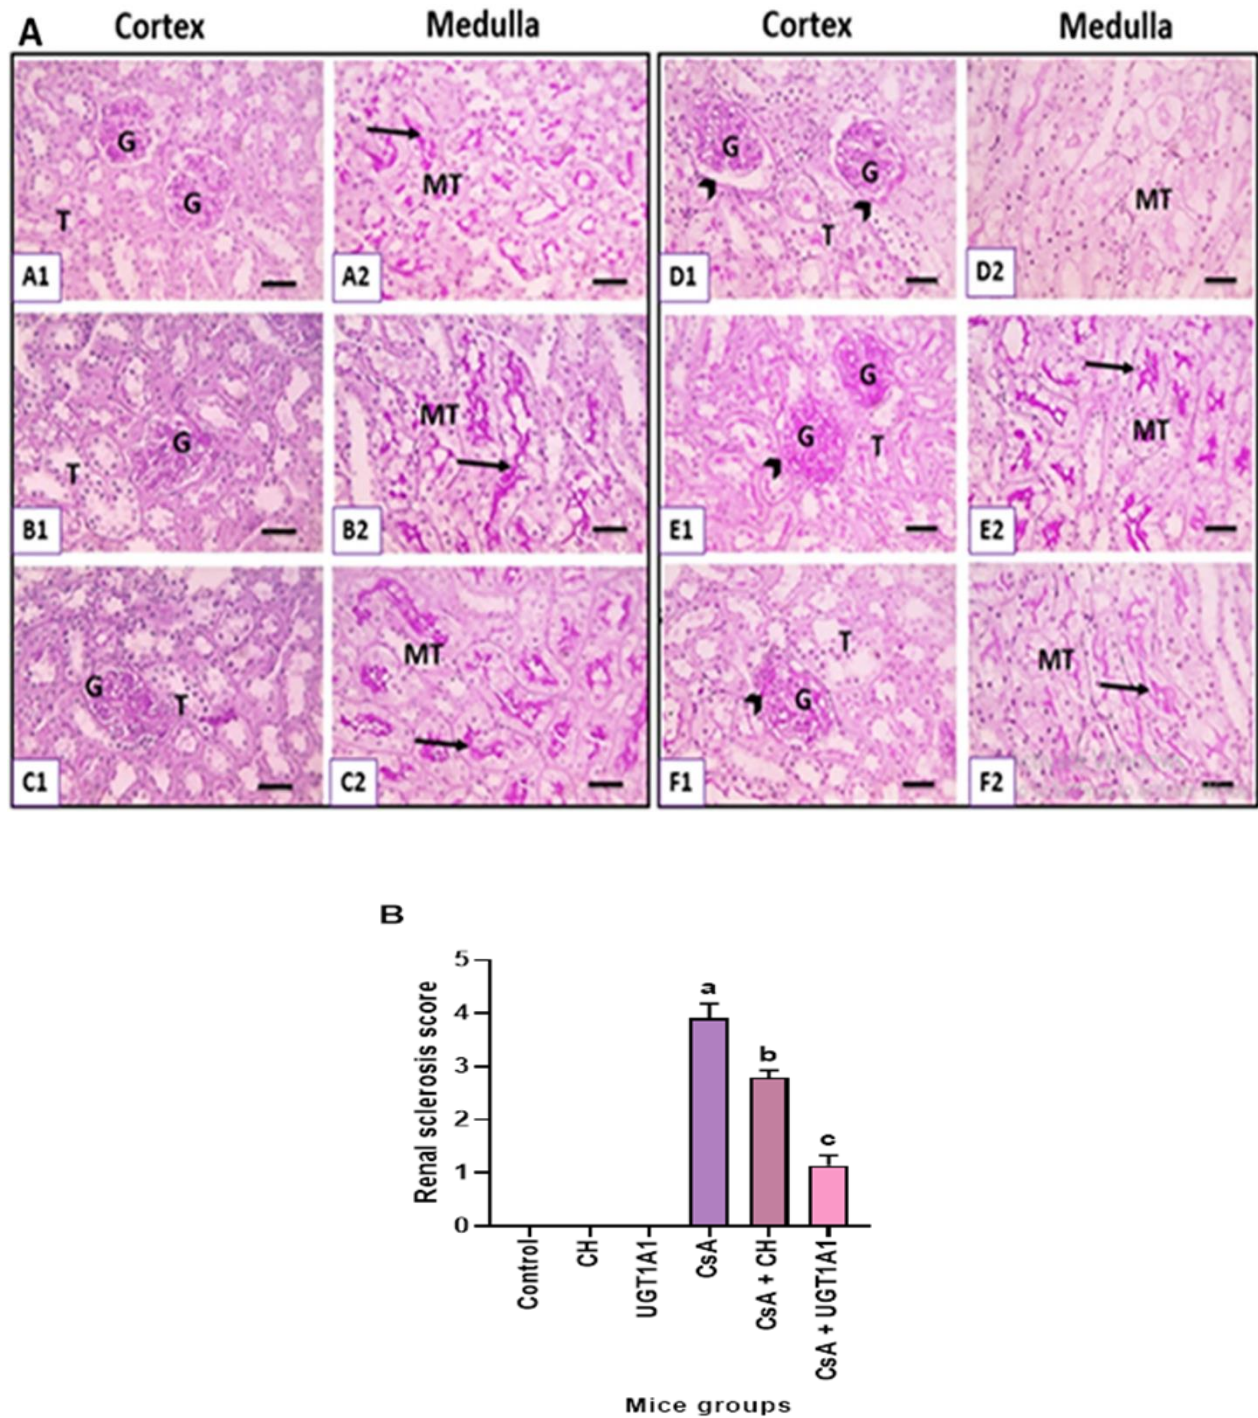

Figure S2: A) Photomicrograph of kidney sections in different experimental groups (PAS; X: 400). Normal structure of cortical glomeruli (G) and tubules (T) besides normal medullary tubules (MT) in kidney sections of the control group (A1, A2), CH-treated

group (B1, B2), and UGT1A1 antisense oligonucleotide-treated group (C1, C2) where the nucleus stained blue, glomerular basement membrane and MT brush borders stained purple (arrows). Glomerular swelling, increased thickness of PAS-positive glomerular basement membrane (arrowheads) with markedly increased renal capsular space, and absent MT brush borders in kidney sections of CsA-treated group (D1, D2). Markedly decreased renal capsular space (arrowhead) with retained PAS positive MT brush borders (arrow) in kidney sections of CsA + CH-treated group (E1, E2). Very mildly thickened glomerular basement membrane (arrowheads) and partially retained PAS positive MT brush borders (arrow) in kidney sections of CsA + UGT1A1 antisense oligonucleotide-treated group (F1, F2). Glomeruli (G) and tubules (T), medullary tubules (MT). B) Semi-quantitative analysis of renal tissue lesions based on the highest % of fields affected with sclerosis (PAS-positive area %) in the cortex and medulla expressed as a score (0-4) in different experimental groups. Values are expressed as mean  $\pm$  SEM (n = 8). Means of different letters are different statistically (P < 0.05). (ANOVA; Duncan's post hoc analysis).

**Supplementary Table S1. Primer sequences used for the target genes and control gene GAPDH in mice.**

| Primer*        | Forward                      | Reverse                      | Accession-numbers |
|----------------|------------------------------|------------------------------|-------------------|
| PPAR- $\alpha$ | 5'-GTGGCTGCTATAATTTGCTGTG-3' | 5'-GGAGTTTGGGAAGAGAAAGGT-3'  | XM_030248424.2    |
| NF- $\kappa$ B | 5'-CAGGACCAGGAACAGTTCGAA-3'  | 5'-CCAGGTTCTGGAAGCTATGGAT-3' | AF199371.2        |
| ETA-R          | 5'-TTGACCTCCCCATCAACGTG-3'   | 5'-AGCACAGAGGTTCAAGACGG-3'   | NM_010332.2       |
| iNOS           | 5'-TAGAGGAACATCTGGCCAGG-3'   | 5'-TGGACCACTGGATCCTGCCG-3'   | NM_001313922.1    |
| AT1-R          | 5'-CACCTATGTAA-GATCGCTTC-3'  | 5'-GCACAATCGCCATAATTATCC-3'  | XM_006516534.3    |
| cFn            | 5'-CTGAACCAGCCTACAGATGAC-3'  | 5'-CATTTTCTCCCTGCCGATCC-3'   | NM_001276413.1    |
| Kim-1          | 5'-ACGGCTCTCTCCTAACTGGT-3'   | 5'-CCACCACCCCCTTTACTTCC-3'   | NM_001166632.1    |

|       |                             |                             |             |
|-------|-----------------------------|-----------------------------|-------------|
| NGAL  | 5'-GGCCAGTTCACCTCTGGGAAA-3' | 5'-TGGCGAACTGGTTGTAGTCC-3'  | NM_008491.1 |
| GAPDH | 5'-GCATCTTCTTGTGCAGTGCC -3' | 5'-TACGGCCAAATCCGTTTACA -3' | AY618199.1  |

\* PPAR- $\alpha$ , peroxisome proliferator-activated receptor-alpha; NF- $\kappa$ B, nuclear factor kappa B; ETA-R, Endothelin type A-receptor; iNOS, inducible nitric oxide synthase; AT1-R, Angiotensin type1-receptor; cFn, cellular fibronectin; Kim-1, Kidney injury molecule-1; NGAL, neutrophil gelatinase-associated lipocalin; and GAPDH, glyceraldehyde-3-phosphate dehydrogenase.
